# Supplementary material for: Daily blood pressure variability in relation to neurological functional outcomes after acute ischemic stroke
Source: Frontiers journal article supplement (doi:10.3389/fneur.2022.958166), 2023-01-09
Supplement: Data_Sheet_1.PDF [file Data_Sheet_1.PDF]

**Comparison of mean BP and BPV according to functional status within 3 months in hypertensive patients**

| Variables               | Total<br>(n = 479) | positive outcome<br>(n = 409) | adverse outcome<br>(n = 70) | P       |
|-------------------------|--------------------|-------------------------------|-----------------------------|---------|
| SBP-Mean, Mean $\pm$ SD | 147.3 $\pm$ 14.7   | 146.7 $\pm$ 14.0              | 150.5 $\pm$ 18.4            | 0.046   |
| SBP-SD, Mean $\pm$ SD   | 12.2 $\pm$ 4.0     | 11.9 $\pm$ 3.8                | 13.9 $\pm$ 4.6              | < 0.001 |
| SBP-CV, Mean $\pm$ SD   | 8.3 $\pm$ 2.7      | 8.1 $\pm$ 2.6                 | 9.3 $\pm$ 3.2               | < 0.001 |
| DBP-Mean, Mean $\pm$ SD | 83.9 $\pm$ 10.0    | 84.2 $\pm$ 10.2               | 82.3 $\pm$ 9.0              | 0.15    |
| DBP-SD, Mean $\pm$ SD   | 8.6 $\pm$ 12.4     | 8.6 $\pm$ 13.4                | 8.7 $\pm$ 2.8               | 0.946   |
| DBP-CV, Mean $\pm$ SD   | 10.0 $\pm$ 8.6     | 9.8 $\pm$ 9.2                 | 10.8 $\pm$ 3.6              | 0.411   |
